# Supplementary material for: An insight into the origin of room-temperature ferromagnetism in SnO2and Mn-doped SnO2quantum dots: an experimental and DFT approach
Source: Royal Society of Chemistry journal article supplement (doi:10.1039/c7cp07182e), 2018-01-01
Supplement: c7cp07182e1.pdf [file c7cp07182e1.pdf]

## **An insight into the origin of room-temperature ferromagnetism in SnO<sub>2</sub> and Mn -doped SnO<sub>2</sub> quantum dots: an experimental and DFT approach**

Dhamodaran Manikandan,<sup>a</sup> D. W. Boukhvalov,<sup>bc</sup> S. Amirthapandian,<sup>d</sup> I. S. Zhidkov,<sup>e</sup>

A. I. Kukhareenko,<sup>e</sup> S. O. Cholakh,<sup>e</sup> E. Z. Kurmaev<sup>ef</sup> and Ramaswamy Murugan<sup>\*a</sup>

### **Supporting Information**

- 1. FWHM of (110) diffraction peak as a function of Mn concentration and magnified diffraction peak (110).**
- 2. Lattice parameters as a function of Mn concentration with error bars (Graphical representation).**
- 3. Deconvoluted room temperature Raman spectra.**
- 4. Temperature dependent Raman spectra and temperature dependence of classical Raman modes.**

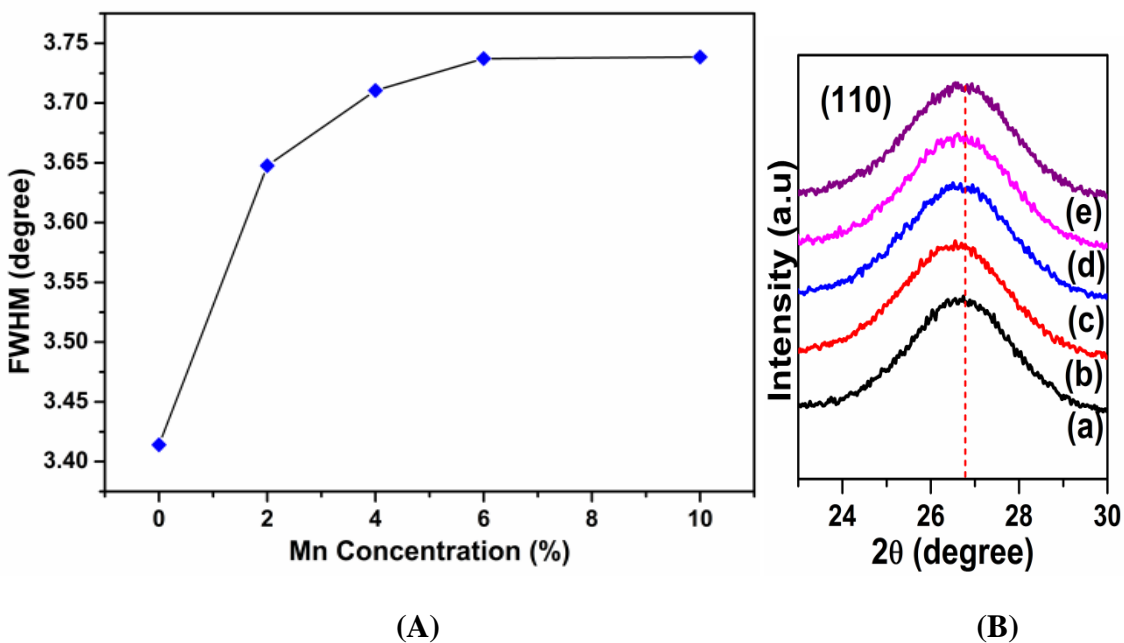

Fig. S1 (A) FWHM of (110) diffraction peak as a function of Mn concentration (B) Magnified diffraction peak (110) a) Undoped SnO<sub>2</sub> b) 2% Mn doped SnO<sub>2</sub> c) 4% Mn doped SnO<sub>2</sub> d) 6% Mn doped SnO<sub>2</sub> and e) 10% Mn doped SnO<sub>2</sub> QDs.

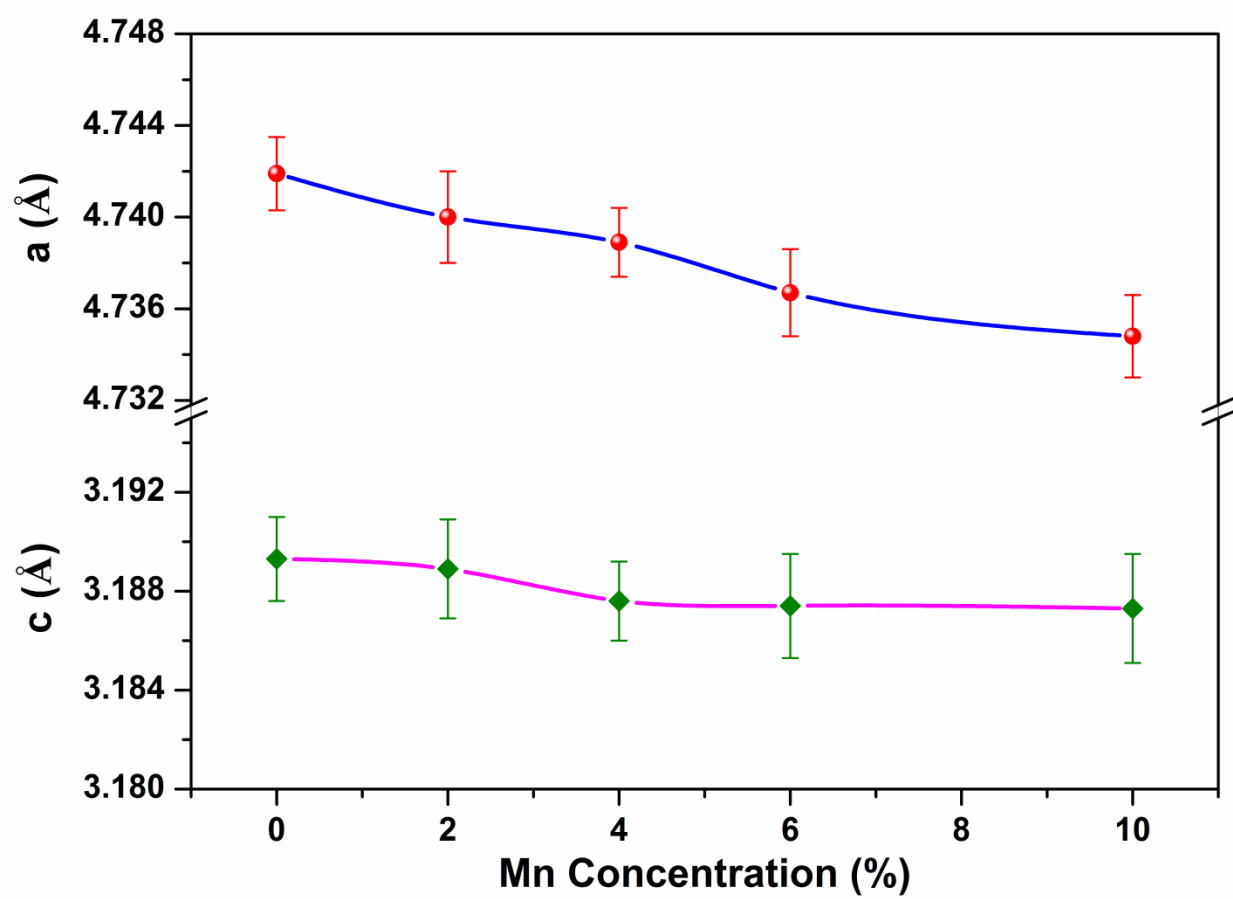

Fig. S2 Lattice parameter as a function of Mn concentration with error bars.

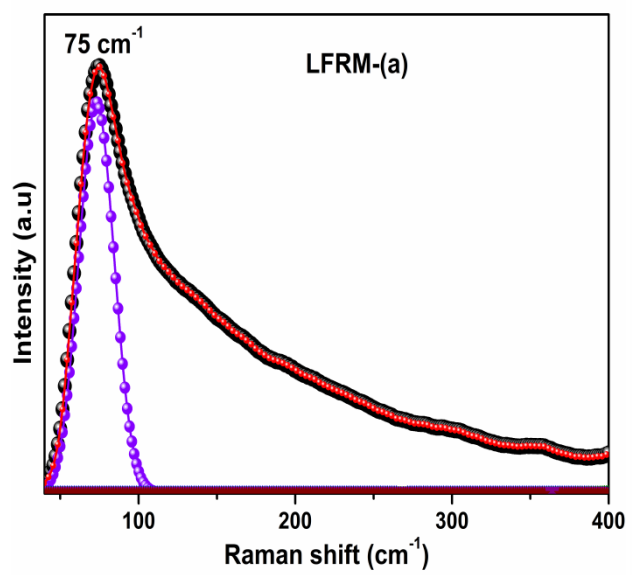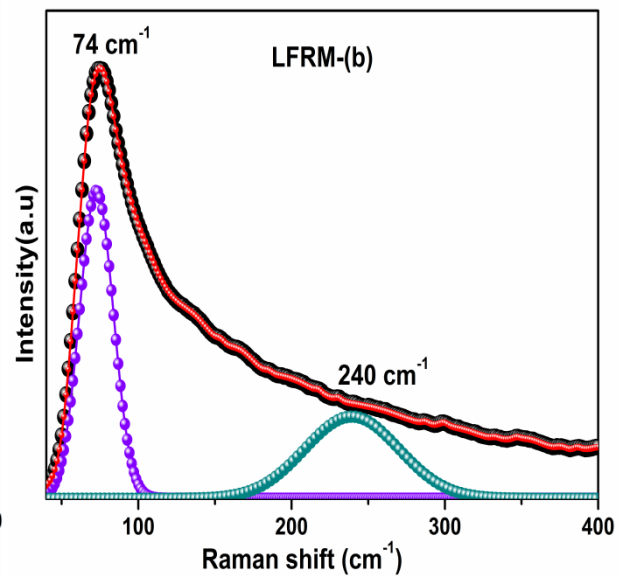

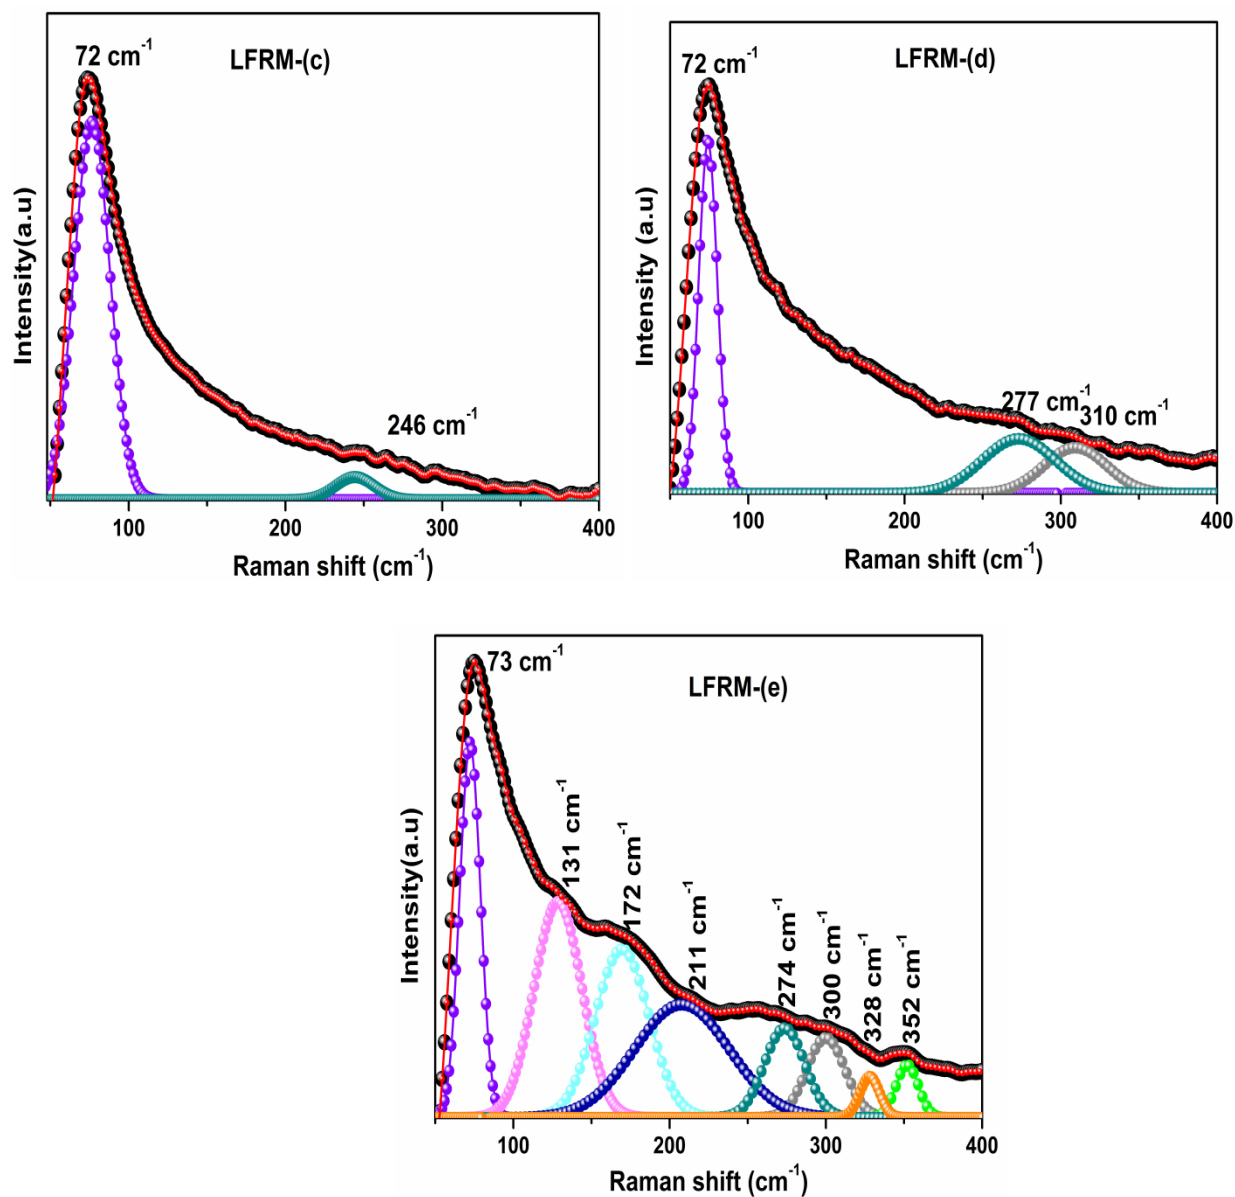

Fig. S3 Deconvoluted room temperature Raman spectra measured in the region 50-400 cm<sup>-1</sup> of a) Undoped SnO<sub>2</sub> and b) 2% Mn doped SnO<sub>2</sub> c) 4% Mn doped SnO<sub>2</sub> d) 6% Mn doped SnO<sub>2</sub> and e) 10% Mn doped SnO<sub>2</sub> QDs.

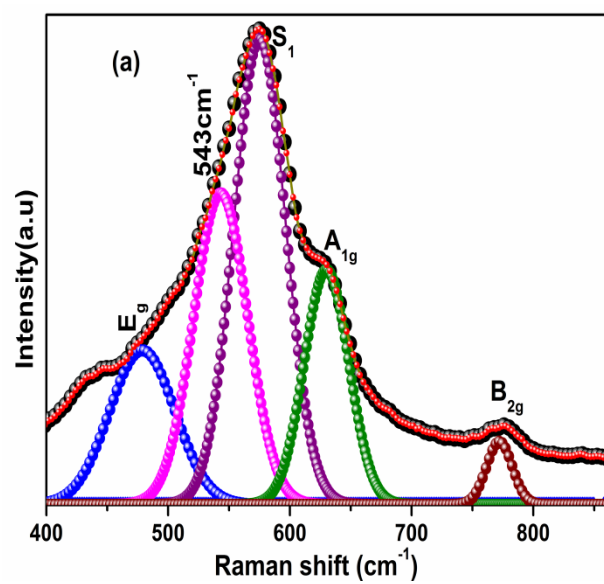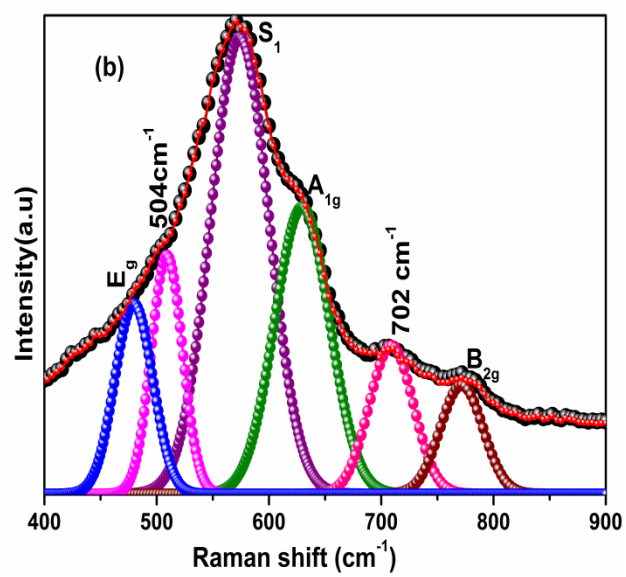

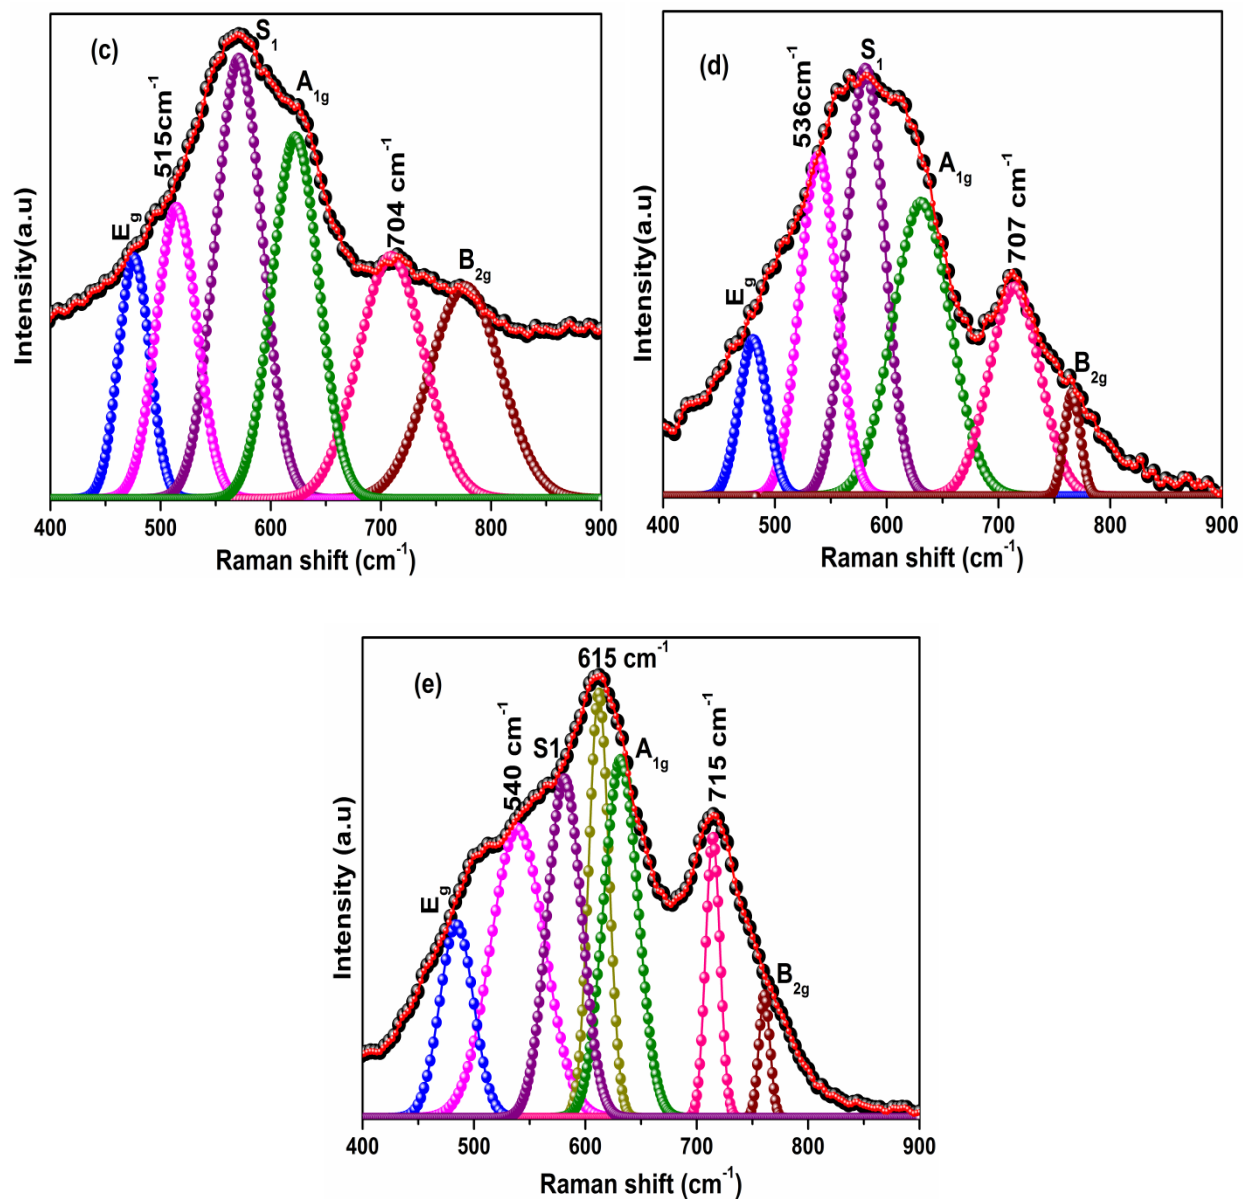

Fig. S4 Deconvoluted room temperature Raman spectra measured in the region 400-900 cm<sup>-1</sup> of a) Undoped SnO<sub>2</sub> and b) 2% Mn doped SnO<sub>2</sub> c) 4% Mn doped SnO<sub>2</sub> d) 6% Mn doped SnO<sub>2</sub> and e) 10% Mn doped SnO<sub>2</sub> QDs.

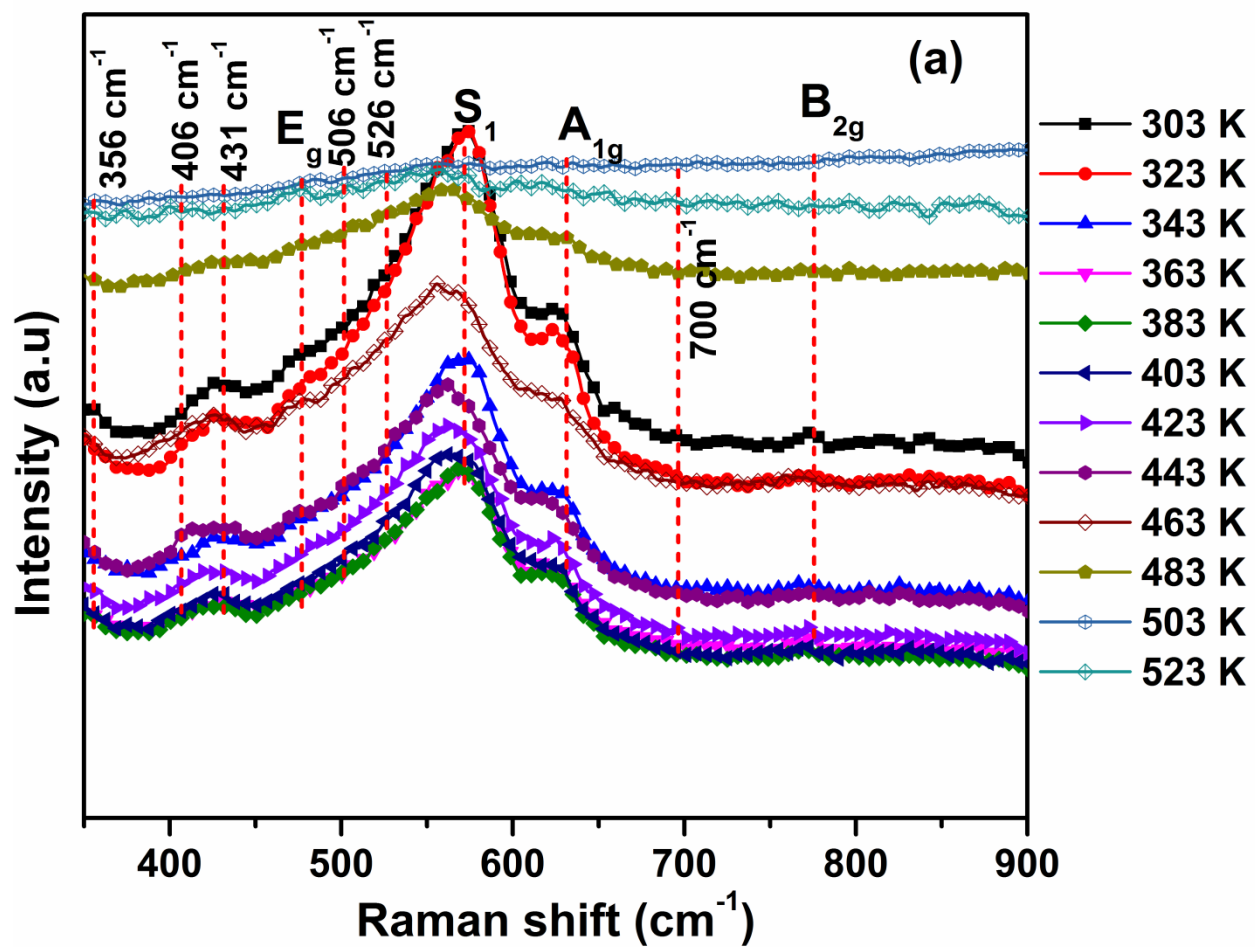



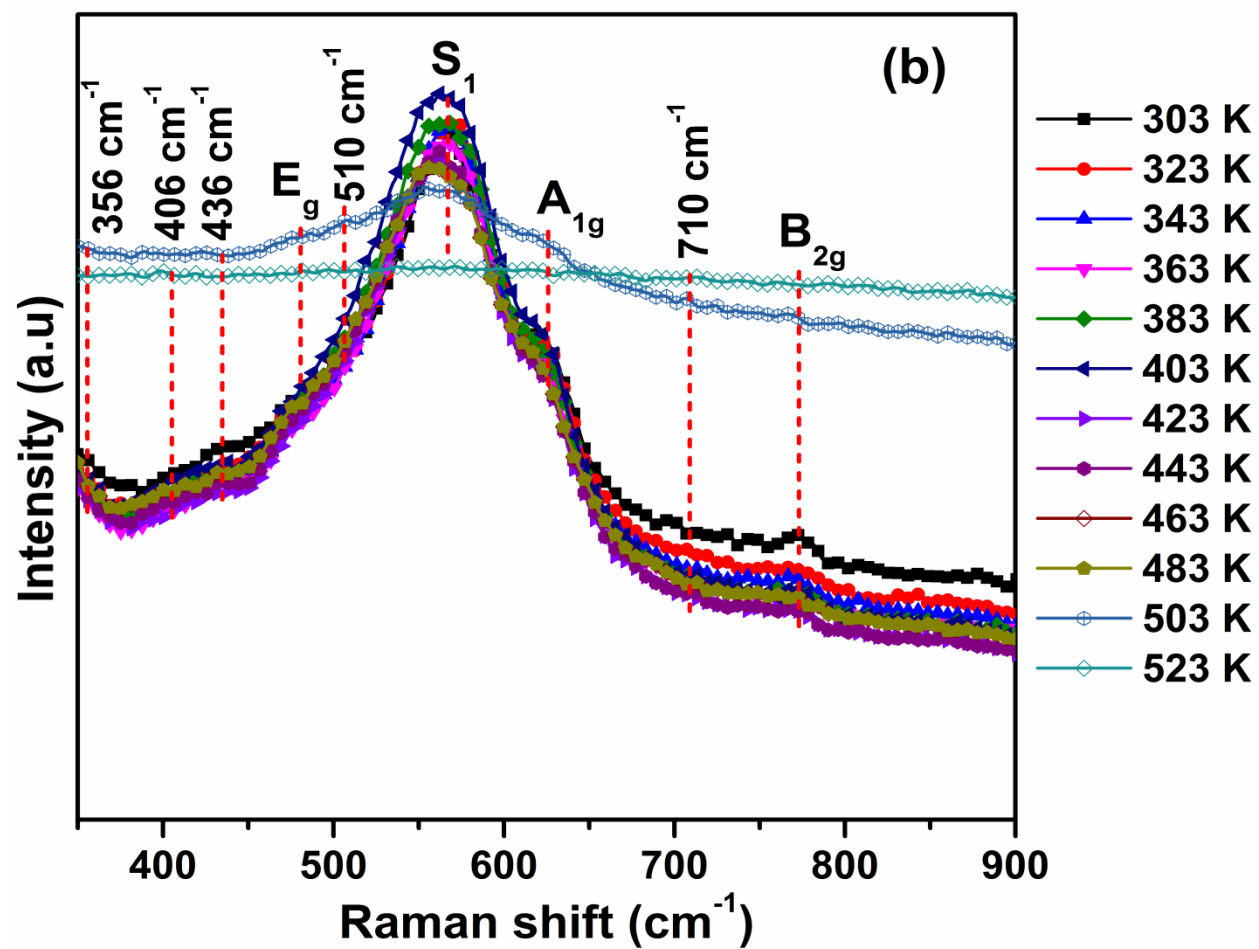

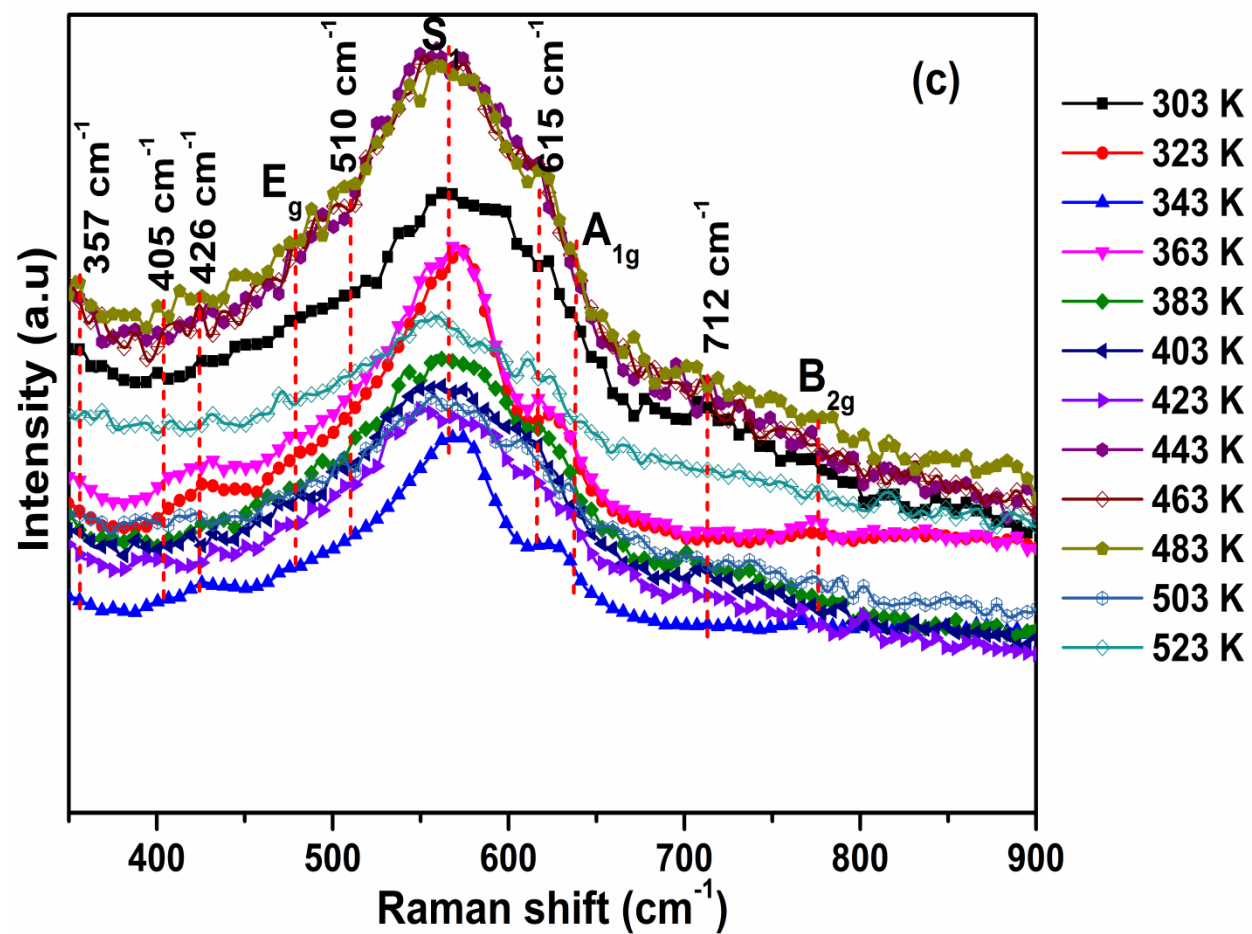

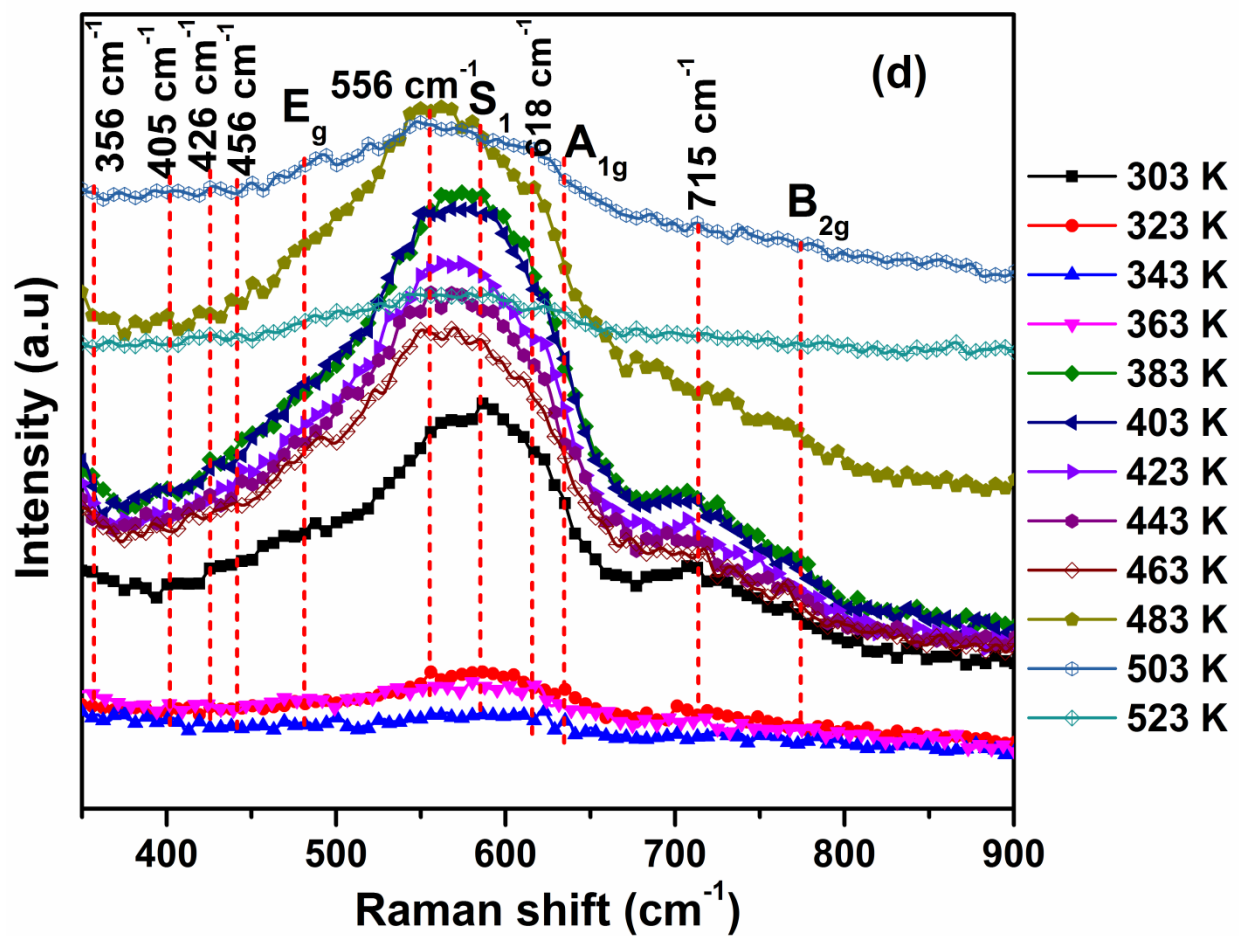

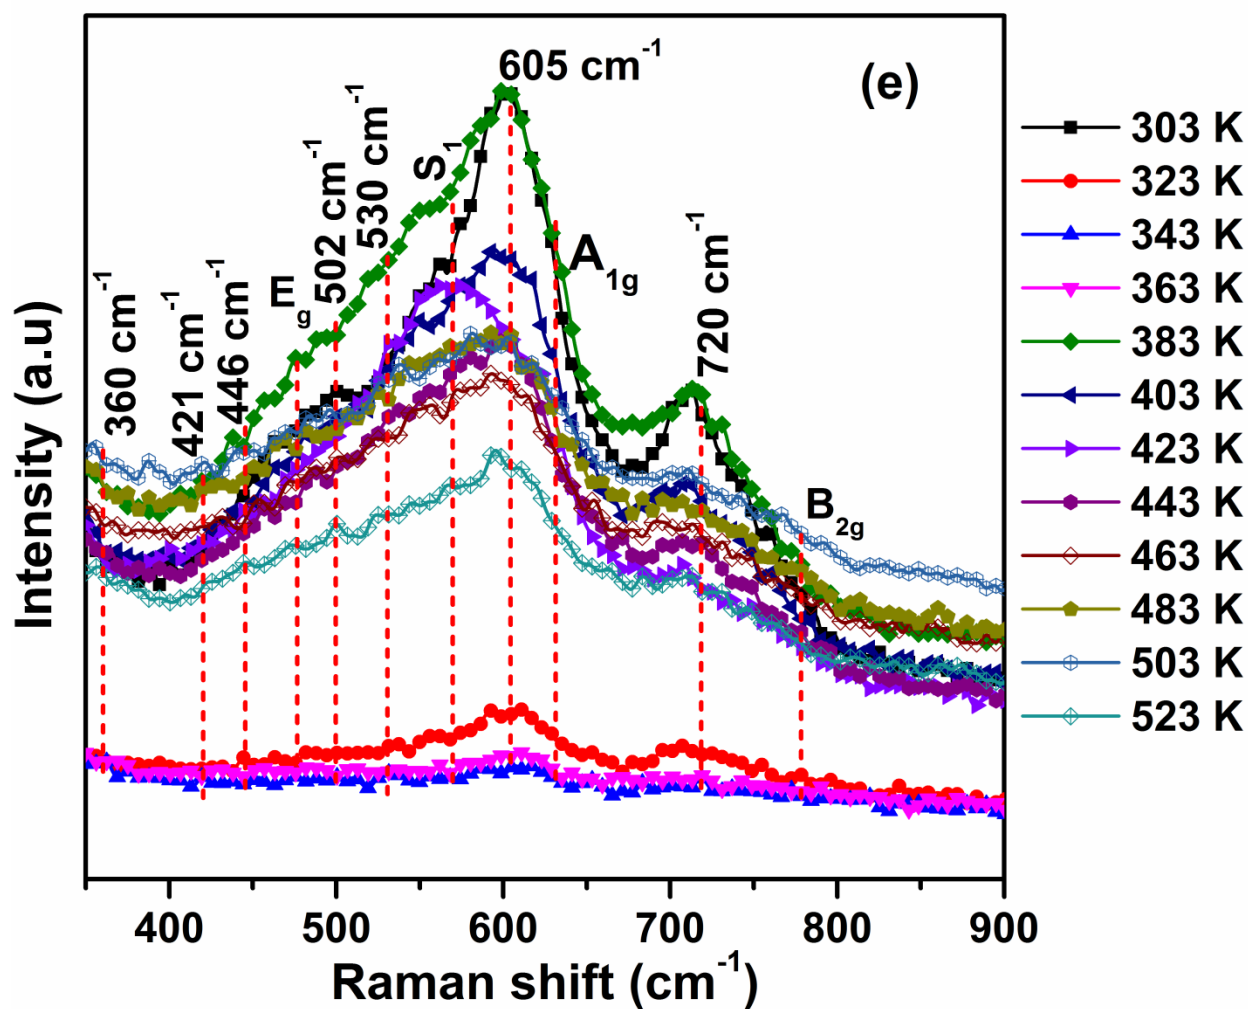

Fig. S5 Temperature dependent Raman spectra measured in the region 350-900  $\text{cm}^{-1}$  of a) Undoped  $\text{SnO}_2$  and b) 2% Mn doped  $\text{SnO}_2$  c) 4% Mn doped  $\text{SnO}_2$  d) 6% Mn doped  $\text{SnO}_2$  and e) 10% Mn doped  $\text{SnO}_2$  QDs.

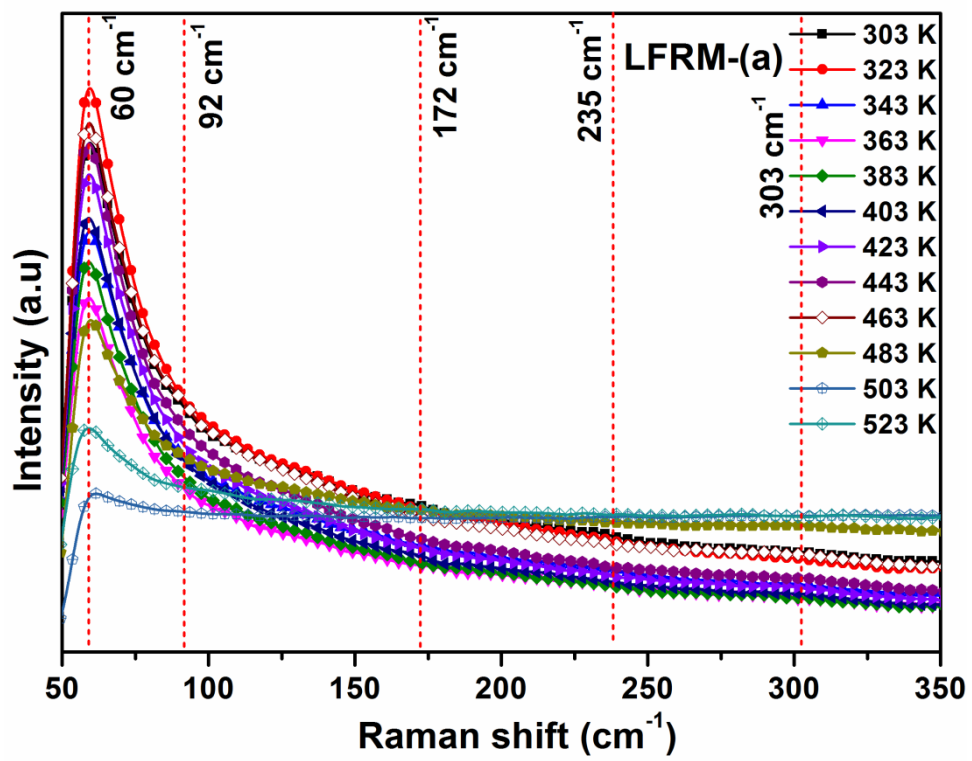

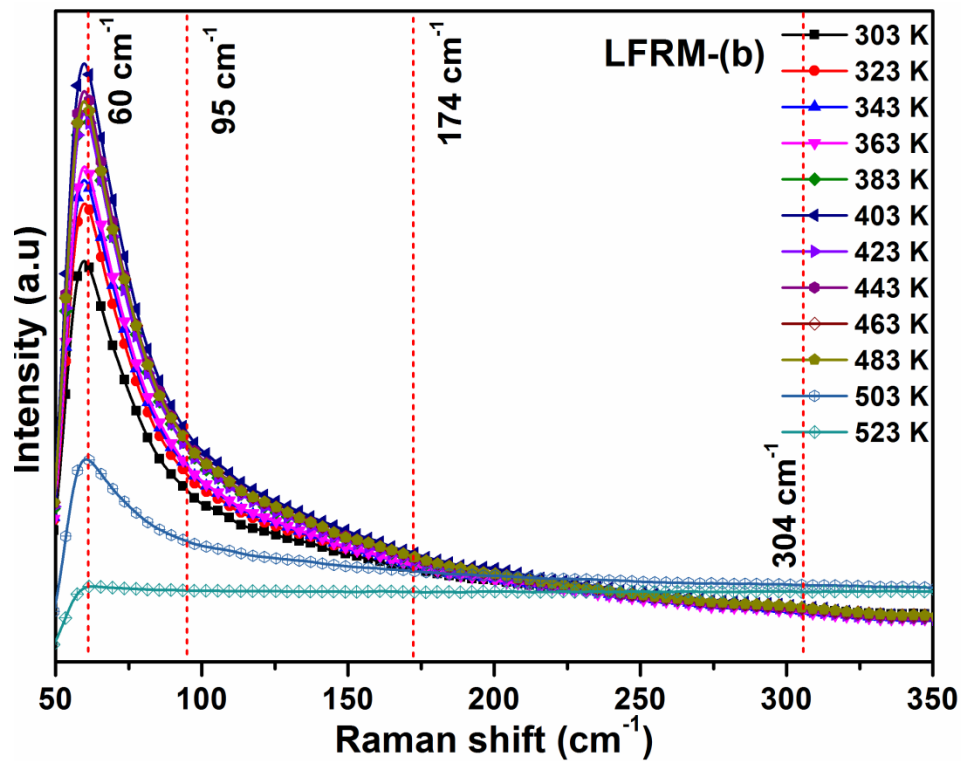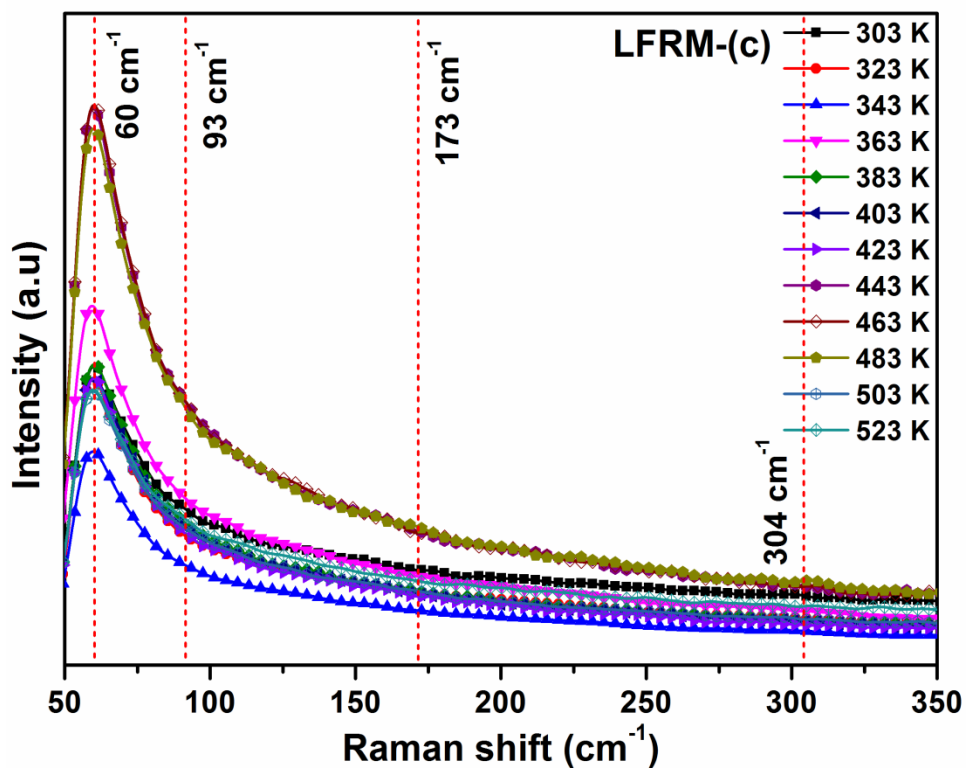

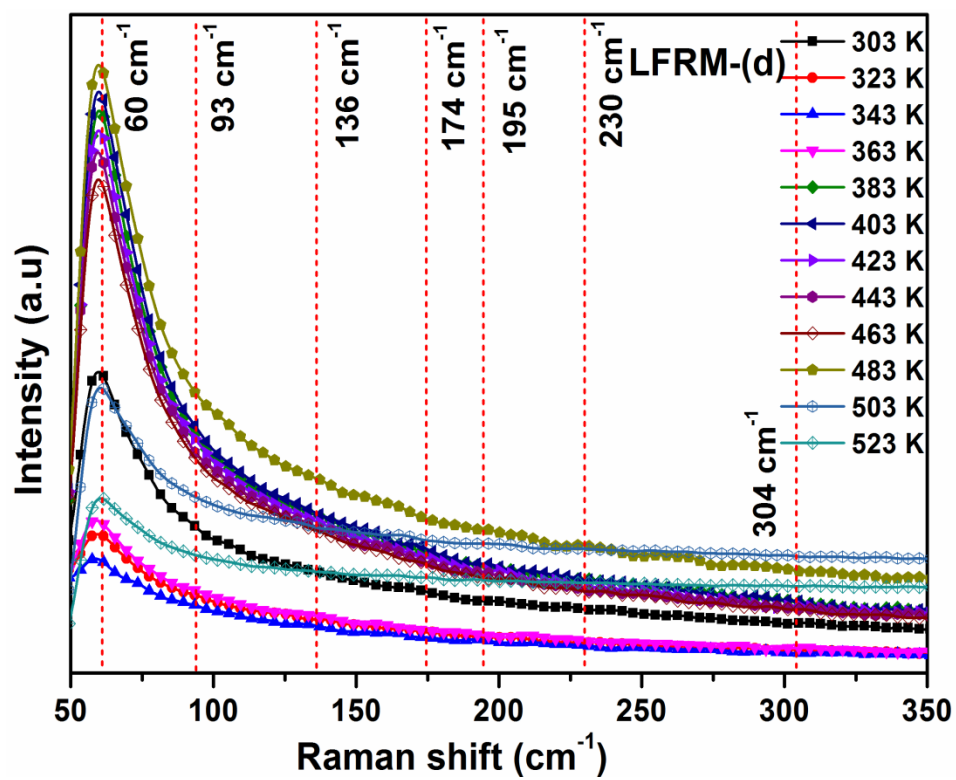

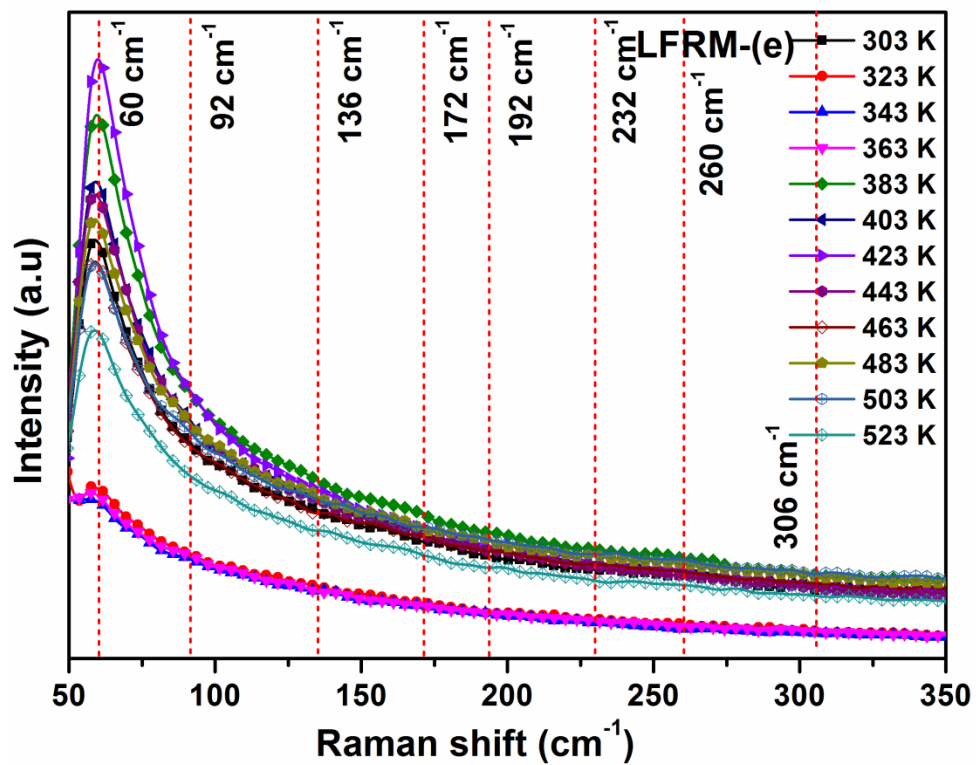

Fig. S6 Temperature dependent Raman spectra measured in the region 50-350 cm<sup>-1</sup> of a) Undoped SnO<sub>2</sub> and b) 2% Mn doped SnO<sub>2</sub> c) 4% Mn doped SnO<sub>2</sub> d) 6% Mn doped SnO<sub>2</sub> and e) 10% Mn doped SnO<sub>2</sub> QDs.



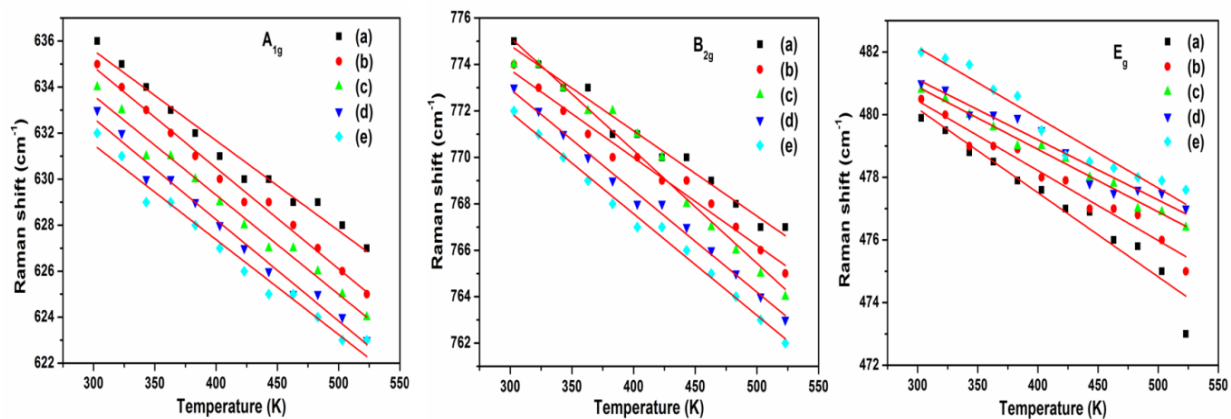

Fig. S7 Temperature dependence of classical Raman modes of a) Undoped SnO<sub>2</sub> b) 2% Mn doped SnO<sub>2</sub> c) 4% Mn doped SnO<sub>2</sub> d) 6% Mn doped SnO<sub>2</sub> and e) 10% Mn doped SnO<sub>2</sub> QDs. (scatter points are experimental data and red line represents fitting using straight line equation (3))
